1 **Phylogenetic expression profiling reveals widespread coordinated evolution of gene**  
2 **expression**

3

4 Trevor Martin and Hunter B. Fraser\*

5

6 Department of Biology, Stanford University, Stanford, CA 94305, USA.

7 \*Correspondence: hbfraser@stanford.edu

8

9 **Running Title**

10 Phylogenetic expression profiling

11

12 **Keywords**

13 **phylogenetic profiling; gene expression; evolution**

14

15 **Abstract**

16

17 Phylogenetic profiling, which infers functional relationships between genes based on patterns of  
18 gene presence/absence across species, has proven to be highly effective. Here we introduce a  
19 complementary approach, phylogenetic expression profiling (PEP), which detects gene sets with  
20 correlated expression levels across a phylogeny. Applying PEP to RNA-seq data consisting of  
21 657 samples from 309 diverse unicellular eukaryotes, we found several hundred gene sets  
22 evolving in a coordinated fashion. These allowed us to predict a role of the Golgi apparatus in  
23 Alzheimer's disease, as well as novel genes related to diabetes pathways. We also detected  
24 adaptive evolution of tRNA ligase levels to match genome-wide codon usage. In sum, we found  
25 that PEP is an effective method for inferring functional relationships—especially among core  
26 cellular components that are never lost, to which phylogenetic profiling cannot be applied—and  
27 that many subunits of the most conserved molecular machines are coexpressed across  
28 eukaryotes.

29 **Introduction**

30 Many cellular functions are carried out by groups of proteins that must work together,  
31 such as pathways and protein complexes. When one of these functions is no longer needed by a  
32 particular species, then there is no longer any selection to maintain the genes needed specifically  
33 for this function, and they will eventually deteriorate into pseudogenes or be lost altogether. A  
34 method known as phylogenetic profiling (PP) leverages this idea, correlating patterns of gene  
35 presence/absence across species to identify functionally related genes (Pellegrini et al. 1999).  
36 For example, this technique has been used to discover novel genes involved in Bardet-Biedl  
37 Syndrome (BBS) (Mykytyn et al. 2004; Chiang et al. 2004; Li et al. 2004) and mitochondrial

38 disease (Pagliarini et al. 2008), since these diseases involve genes that have been lost in multiple  
39 independent lineages. In these studies, patterns of gene conservation across species are typically  
40 represented by their binary presence/absence, and knowledge of the species phylogeny is used to  
41 identify genes whose losses have coincided with those of well-characterized genes (Li et al.  
42 2014). Coordinated gene losses can then be analyzed for gene pairs individually or gene groups  
43 as a whole to reveal functional relationships (Tabach et al. 2013b).

44 In addition to the correlated gene losses that are the focus of phylogenetic profiling (PP),  
45 coordinated evolution of gene expression levels can also indicate functional similarity (in this  
46 work we distinguish between coevolution, in which a gene evolves in direct response to changes  
47 in another, and coordinated/correlated evolution, in which genes evolve in a coordinated fashion  
48 that may or may not be in response to one another). For example, coordinated evolutionary  
49 changes have been observed between computationally predicted expression levels (based on  
50 codon usage bias) in yeast and other microbes (Lithwick and Margalit 2005; Fraser et al. 2004).  
51 Experimentally measured gene expression levels could also potentially uncover genes with  
52 correlated evolution, including genes that are never lost and thus not amenable to PP (Figure  
53 1A); however in practice this has not been possible because of the small number of species, and  
54 the narrow phylogenetic breadth, in previous studies of gene expression evolution. The largest  
55 such studies have been limited to a few dozen species and have focused exclusively on mammals  
56 (Perry et al. 2012; Fushan et al. 2015) or yeast (Thompson et al. 2013), in contrast to recent PP  
57 studies that rely on hundreds of complete genome sequences from widely divergent species (Li  
58 et al. 2014; Dey et al. 2015; Tabach et al. 2013a).

59 In this study we developed an approach, phylogenetic expression profiling (PEP), that  
60 utilizes cross-species gene expression data to infer functional relationships between genes. We

61 applied PEP to the most phylogenetically diverse gene expression data set generated to date:  
62 RNA-seq for 657 samples from 309 species. These species are eukaryotic marine microbes  
63 collected from across the world, spanning 12 phyla that represent most major eukaryotic  
64 lineages, including many rarely studied clades that lack even a single sequenced genome (Figure  
65 1B) (Keeling et al. 2014). All RNA samples were prepared, sequenced, and analyzed following a  
66 standardized pipeline established by the Marine Microbial Eukaryotic Transcriptome Project  
67 (MMETSP) (Keeling et al. 2014). Some of the MMETSP RNA-seq data has been examined in  
68 studies of specific species (Ryan et al. 2014; Koid et al. 2014; Santoferrara et al. 2014;  
69 Frischkorn et al. 2014), but the data have not previously been analyzed collectively.

70

## 71 **Results**

72 In order to apply PEP to the MMETSP data (Keeling et al. 2014), we created a matrix of  
73 gene expression levels for 4,219 genes that had detectable expression in at least 100 of the 657  
74 samples (Figure 1C; Supplemental Fig. S1; see Methods). To identify coordinated evolution, we  
75 calculated all pairwise Spearman correlations between genes in the expression matrix. Because  
76 of the complex phylogenetic structure of the data, which can inflate correlations due to non-  
77 independence, we did not attempt to assign p-values to individual pairwise PEP correlations;  
78 rather we focused on detecting coordinately evolving groups of genes, for which we can create a  
79 random permutation-based null distribution that precisely captures the effects of phylogenetic  
80 structure, even when the phylogeny is not known (Fraser 2013) (see Methods). To ensure that  
81 PEP does not utilize gene presence/absence information—so that its results are independent of  
82 PP—we restricted all correlations to samples in which a given pair of genes were both detectably  
83 expressed.

84 To test the performance of PEP, we compared our results to PP in two ways. First, we  
85 examined genes with a known role in cilia, since this organelle is one of the most significant  
86 gene sets implicated by many PP studies (Dey et al. 2015; Li et al. 2014; Avidor-Reiss et al.  
87 2004). We found this gene set was also enriched for high PEP correlations (Figure 2A;  $p =$   
88  $5.1 \times 10^{-5}$ ), indicating that the ciliary genes show coordinated evolution of gene expression, in  
89 addition to gene loss. We then compared the two methods at a finer scale, by asking whether the  
90 specific ciliary gene pairs with the strongest PP signal also show coordinated evolution by PEP.  
91 Comparing the PEP correlations to the binary presence/absence PP correlations, we found a  
92 moderate level of agreement (Figure 2B;  $p = 3.4 \times 10^{-22}$ ), suggesting that the specific ciliary gene  
93 pairs most likely to be lost together also tend to have coordinately evolving expression levels.

94 We then asked whether PEP and PP agree at a more broad scale, by testing whether the  
95 collection of all coordinately evolving modules identified in a recent PP study (Li et al. 2014)  
96 showed increased PEP signal as well. To achieve this, we calculated the median PEP score  
97 within each of the 327 PP modules. We found significant ( $p = 2.9 \times 10^{-47}$ ; see Methods)  
98 enrichment for PEP correlations in these previously identified PP modules, suggesting that PEP  
99 detects many of the same gene sets implicated by PP. For example, some of the strongest PEP  
100 correlations were for gene sets involved in the ribosome, spliceosome, and cilia.

101 To identify additional coordinately evolving modules not detected by PP, we applied PEP  
102 to a collection of 5,914 previously characterized gene sets, including both pathway and disease  
103 databases (see Methods). Of these, we found 662 gene sets with significant coordinated  
104 evolution, compared to only ~33 expected at this level by chance (Figure 2C; 5% FDR;  
105 Supplemental Table S1). Most of these were gene sets with no previous evidence of coordinated  
106 evolution from PP studies, such as RNA degradation, the proteasome, and the nuclear pore

107 complex. Examining all pairwise PEP correlations within each of these gene sets revealed that  
108 the coordinated evolution tends to be shared across most gene pairs, rather than only driven by a  
109 small subset of them (e.g. as shown for proteasome genes in Figure 2D). Many of these  
110 coordinately evolving gene sets have been hidden from PP analysis because of the rarity of  
111 losing these genes (Supplemental Fig. S2).

112         Having identified hundreds of cases of coordinated evolution within gene sets, we then  
113 asked whether we could also detect coordinated evolution between gene sets. To identify these,  
114 we calculated the PEP correlation between each pair of genes in a given pair of gene sets  
115 (excluding any genes present in both; see Methods). Among the 218,791 pairs of gene sets we  
116 tested, 22,665 had evidence of coordinated evolution (with  $<1$  expected by chance; Supplemental  
117 Table S2). For example, we found that genes involved in the Golgi apparatus had strong  
118 evidence ( $p = 2.9 \times 10^{-5}$ ) of coordinated evolution with genes down-regulated in Alzheimer's  
119 disease (Figure 3A). Previous studies have implicated Golgi fragmentation in the pathogenesis of  
120 Alzheimer's (Joshi et al. 2014; Joshi et al. 2015) and this coordinated evolution gives additional  
121 evidence for a functional relationship between these gene sets.

122         In addition to identifying coordinated evolution within and between known gene sets,  
123 PEP can also implicate novel genes evolving in tandem with a known gene set. For this analysis,  
124 we calculated the PEP correlation between the genes in a given set and every other gene; those  
125 with the strongest median correlations are most likely to be functionally related to that set. Of  
126 particular interest is identifying novel disease-related genes by implicating genes related to  
127 disease pathways. For example, *TULP2*—a member of the tubby-like gene family—had the  
128 highest PEP correlation with the diabetes pathway gene set (Figure 3B;  $p = 3.0 \times 10^{-4}$ ) and is in a  
129 linkage region for severe obesity (Bell et al. 2004). The second strongest PEP correlation ( $p =$

130  $9.1 \times 10^{-3}$ ) is *GCHI*, which is adjacent to a SNP with moderate ( $p = 6.1 \times 10^{-6}$ ) association with  
131 type 2 diabetes (T2D) (Wellcome Trust Case Control Consortium 2007). Moreover, *GCHI*  
132 contains SNPs strongly ( $p = 7.6 \times 10^{-64}$ ) associated with circulating galectin-3 levels, which is  
133 itself associated with insulin resistance and obesity (de Boer et al. 2012). The genes coordinately  
134 evolving with diabetes pathways were enriched for T2D GWAS associations ( $p = 2.3 \times 10^{-2}$  for  
135 the top 10 genes, and  $p = 2.6 \times 10^{-2}$  for the genome-wide trend; see Methods), suggesting that the  
136 PEP correlations are indeed predictive of genes involved in T2D.

137         Several characteristics of the MMETSP samples, such as the location of collection, were  
138 recorded for most samples. To investigate whether any gene expression levels show a latitudinal  
139 gradient across the diverse set of MMETSP species, we correlated absolute latitude with  
140 expression levels of every gene. Although we did not find any functions significantly enriched in  
141 the latitude-associated genes, the most strongly correlated gene was the translesion DNA  
142 polymerase *POLH* (Figure 4A; Spearman's  $\rho = -0.52$ ,  $p = 2.4 \times 10^{-24}$ ). Expression was generally  
143 higher closer to the equator, as expected if its mRNA level has evolved in response to the local  
144 levels of UV radiation.

145         Other characteristics of each species can be estimated directly from the assembled  
146 transcriptomes. For example, in each species we calculated the genome-wide fraction of codons  
147 encoding each amino acid, and tested whether these fractions predict the expression levels of the  
148 corresponding tRNA ligases—enzymes that “charge” tRNAs with the appropriate amino acid. Of  
149 the ten tRNA ligases with expression data, all ten had a higher than codon median correlation  
150 with the relative abundances of their respective codons (binomial  $p = 9.8 \times 10^{-4}$ ). For example, the  
151 association between the expression of the aspartate-tRNA ligase (*DARS*) and aspartate codon  
152 abundance is shown in Figure 4B (Spearman's  $\rho = 0.40$ ,  $p = 4.8 \times 10^{-15}$ ).

153

154 **Discussion**

155         The PEP method introduced here builds on traditional PP, and together with the most  
156 phylogenetically diverse gene expression data set available to date, it revealed widespread  
157 evidence for coordinated evolution of gene expression. Interestingly, our method – which only  
158 relies on species where a gene is present – identified previously well-studied gene sets with  
159 coordinated losses such as ciliary genes, in addition to identifying many previously unidentified  
160 sets of coordinately evolving genes. One explanation for why gene sets such as mismatch repair  
161 have not been identified by PP is that PP is substantially underpowered to detect these gene sets  
162 because of the rarity of their loss across species.

163         Further, our analysis of coordinated evolution between gene sets allows us to infer  
164 functional linkages between known biological pathways. In particular, Golgi fragmentation in  
165 Alzheimer’s disease has been linked to promotion of amyloid beta production (Joshi et al. 2014)  
166 and potential phosphorylation of the tau protein which underlies the formation of neurofibrillary  
167 tangles (Jiang et al. 2014). Notably, since the Golgi genes are not themselves mis-regulated in  
168 Alzheimer’s disease, a differential expression analysis of the Alzheimer’s patient samples vs.  
169 controls could not provide this connection. Additionally, genes such as *GCHI* with nominally  
170 but not genome-wide significant p-values of association with traits such as T2D would not be  
171 identified as playing a role in disease pathways without the orthogonal evidence of association  
172 such as the coordinated evolution evidence presented in this study.

173         Previously, within single species or genera, many latitudinal gradients of traits have been  
174 reported, which are often attributed to local adaptations to climate (Fraser 2013; Hancock et al.  
175 2011; Franks and Hoffmann 2012; Savolainen et al. 2013). This study has expanded such



176 analyses across major phylogenetic groups and the identification of *POLH*, which plays an  
177 important role in the repair of UV-induced damage and leads to xeroderma pigmentosum when  
178 mutated in humans (Masutani et al. 1999), is a novel example of a potential gene expression  
179 based response to environmental variability. Additionally, our identification of tRNA ligase  
180 levels as associating with codon abundance suggests that tRNA ligase levels may adaptively  
181 evolve in response to species-specific codon usage, and is consistent with patterns of tRNA gene  
182 copy number and codon usage in bacteria (Higgs and Ran 2008).

183 Overall, applying our PEP framework to a gene expression data set of unprecedented  
184 phylogenetic diversity, we identified many novel examples of coordinated evolution. These  
185 included hundreds of cases of coordinated evolution within and between previously  
186 characterized gene sets, and also coordinated evolution implicating novel genes related to  
187 diabetes pathways. Although it may at first seem surprising that unicellular eukaryotes could  
188 shed light on complex diseases like Alzheimer's and T2D, the fact that the genes are present  
189 throughout eukaryotes suggests that the underlying cellular functions are far more conserved  
190 than the specific human disease phenotypes—consistent with previous work, for example using  
191 yeast to study Parkinson's disease (Gitler et al. 2008) and plants to study neural crest defects  
192 (McGary et al. 2010).

193 We expect that as the diversity of species with publicly available gene expression data  
194 continues to grow, PEP will become a powerful approach for detecting coordinated evolution at  
195 the molecular level, and for leveraging these patterns to inform us about functional connections  
196 between genes conserved throughout the tree of life.

## 197 **Methods**

### 198 *Data filtering and normalization*

199         Raw reads and transcriptome assembled coding sequence (CDS) data for 669 individually  
200 annotated samples and 119 jointly annotated sample sets from the Marine Microbial Eukaryote  
201 Transcriptome Sequencing Project (MMETSP) were downloaded from the CAMERA database  
202 (<http://camera.crbs.ucsd.edu/mmetsp/index.php>). Details on each annotation method (performed  
203 by the MMETSP project) can be found on the MMETSP website  
204 (<http://marinemicroeukaryotes.org/resources>). All raw reads were then normalized using the  
205 Transcripts per Million (TPM) normalization technique (Wagner et al. 2012). Up to five  
206 Swissprot ID annotations provided by MMETSP for each CDS were then culled for IDs that had  
207 a BLASTP alignment score of at least 80% the maximum alignment score for that CDS, and  
208 converted to UniRef100 IDs (UniRef IDs are comprehensive non-redundant clusters of UniProt  
209 sequences (Suzek et al. 2007)). In order to create vectors of expression across samples for a set  
210 of UniRef100 defined “genes”, normalized read counts were combined within a sample for CDSs  
211 that had at least three matching UniRef100 IDs and then across samples by ranking the  
212 UniRef100 IDs by alignment score and then creating an expression vector for an annotation by  
213 matching the unique top ranked annotations against the top ranked annotation for each CDS in  
214 each sample with ties resolved by annotation score. This initial round of matching was then  
215 followed by matching successively lower ranked annotations of still unmatched normalized read  
216 counts until all are combined into expression vectors. For details see Supplemental Fig. S1. The  
217 expression vectors with at least 100 samples with measured expression were then combined into  
218 a matrix with each column as a sample (669 and 387 samples, for the individual and jointly  
219 annotated sets respectively) and each row as a gene (4,995 and 1,051 genes).

220 For the individually annotated samples, this expression matrix was then normalized by  
221 dividing each sample by the total number of genes in that sample and then adjusting for batch  
222 effects by regressing out the MMETSP transcriptome pipeline used (the two pipelines used  
223 differed in the method for transcriptome assembly), the day the sample was processed, and the  
224 lab that submitted the sample, setting the value of samples missing expression to zero for the  
225 regression step. All variables were regressed out as binary factors. Any samples missing any of  
226 these variables were dropped from the analysis.

227 For both sample annotations, the UniRef100 ID for each gene was converted to a  
228 UniRef50 ID (a more lenient across-species gene clustering than the UniRef100 ID) and any  
229 expression vectors with the same ID were collapsed by sum. The resulting individual annotation  
230 matrix has 4,219 genes and 657 samples and the combined annotation matrix has 1,031 genes  
231 and 387 samples.

232

### 233 *Phylogenetic expression profiling*

234 Gene sets from the Online Mendelian Inheritance in Man (OMIM) database (McKusick-  
235 Nathans Institute of Genetic Medicine, Johns Hopkins University (Baltimore, MD) ), the Human  
236 Phenotype Ontology (HPO) database (Kohler et al. 2014), the Mouse Genome Informatics  
237 (MGI) database (Eppig et al. 2015), and the Molecular Signatures Database (MSigDB)  
238 (Subramanian et al. 2005) were downloaded to create a list of 5,914 gene sets with at least three  
239 genes that mapped to UniRef50 IDs in the individual annotation data set.

240 Phylogenetic expression profiling (PEP) tests for coordinated evolution of gene  
241 expression levels by calculating the median Spearman correlation between all pairwise  
242 combinations of genes in a gene set. Importantly, each pairwise correlation was calculated using

243 only the samples that had expression measured for each gene and the genes that had at least 20  
244 such samples. To calculate the significance of this median correlation, it was compared to 10,000  
245 null median correlations created by random gene sets with the same number of genes, drawn  
246 from the 25 genes that most closely match the data missingness profile of the gene they replace.  
247 The data missingness profile for a gene pair was quantified by the Euclidean distance between  
248 the presence/absence vector of each gene across samples. The significance was then given by:  
249

$$p - value = \frac{(\sum_{i=1}^{10,000} \phi_{\rho_i} + 1)}{(10,001)}$$

$$\phi_{\rho_i} \equiv \begin{cases} 1, \rho_i \geq \rho_{obs} \\ 0, \rho_i \leq \rho_{obs} \end{cases}$$

250

251 The false discovery rate (FDR) is then determined by treating each of the 10,000 permutations as  
252 the real data and calculating 10,000 sets of p-values as above. A sliding p-value cutoff is then  
253 instituted and the ratio of p-values below this cutoff in the real data to the mean of the number of  
254 p-values below this cutoff in the 10,000 null permutations is the FDR.

255

256 *Comparison with previous methods*

257 Evolutionarily conserved modules (ECMs) from the clustering by inferred models of  
258 evolution (CLIME) algorithm applied to human pathways were downloaded from the CLIME  
259 website (<http://www.gene-clime.org/>). The 327 ECMs with an ECM score of greater than five  
260 and at least two genes in the individual annotation matrix were used for the validation test. To  
261 validate the PEP method, we calculated the median correlations for these ECMs in the same way  
262 as PEP, and the median of this distribution across ECMs was then compared to 10,000 null

263 medians calculated using the same null strategy as PEP. The permutation p-value for enrichment  
264 for high PEP scores is then:

$$p - value = \frac{(\sum_{i=1}^{10,000} \phi_{median \rho_i} + 1)}{(10,001)}$$

$$\phi_{median \rho_i} \equiv \begin{cases} 1, & median \rho_i \geq median \rho_{obs} \\ 0, & median \rho_i \leq median \rho_{obs} \end{cases}$$

265

266 Since the observed statistic was more extreme than all 10,000 permutations, a z-score based p-  
267 value was estimated:

$$z - score = \frac{(E[10,000 median \rho_{perm}] - median \rho_{obs})}{(SD[10,000 median \rho_{perm}])}$$

$$p - value = \frac{2}{\sqrt{2\pi}} \int_{-\infty}^{-|z-score|} e^{-x^2/2} dx$$

268

269 The PP correlation of a gene set was calculated by taking the median of the Pearson  
270 correlation of each pairwise presence/absence vector for each gene in the set. For a gene set, the  
271 PP correlation was then compared to the PEP correlation for each gene by calculating the  
272 Pearson correlation between the PEP and PP correlations for each gene pair. The significance of  
273 this correlation was then calculated by permuting the presence and absence vectors for each gene  
274 in the set and then recalculating the PEP vs. PP correlation 10,000 times; the number of times a  
275 permutation beat or matched the observed value divided by the number of permutations was then  
276 the permutation p-value which was then converted to a z-score based p-value as above.

277

278 *Phylogenetic tree construction*

279           The 18S sequence available for 655 samples was downloaded from the CAMERA  
280 database as above and aligned using the multiple sequence alignment tool Clustal Omega  
281 (Sievers et al. 2011). This alignment was then used to create a maximum likelihood based tree  
282 using the program RaxML (Stamatakis 2006) with parameters: -f a -x 12345 -p 12345 -# 100 -  
283 m GTRGAMMA. 18S sequences that did not have available sample meta data were then  
284 dropped, leaving a total of 635 samples.

285

### 286 *Gene set pairwise comparison*

287           The correlation score between two gene sets was calculated by taking the median of the  
288 pairwise gene PEP correlations, excluding any genes present in both gene sets. A dendrogram  
289 relating the gene sets with significant PEP scores at a 5% empirical FDR as calculated above was  
290 created by calculating the matrix of correlation scores between all the significant gene sets,  
291 taking the Euclidean distance between the rows of this matrix, and then hierarchically clustering  
292 these distances using the complete linkage algorithm in R's hclust function (Murtagh ).  
293 Significance of individual gene set pairwise comparisons was calculated in two steps by first  
294 computing the p-value for the observed correlation between each of the gene sets in the  
295 comparison and 10,000 gene sets matched by phylogenetic profile and size as in the PEP method  
296 above. The maximum of these two p-values for random gene set associations was then taken to  
297 give the p-value for the gene set comparison.

298           Subsets of this dendrogram were then created by cutting the tree at the height which gives  
299 15 unique groups. We tested these subsets for gene set enrichments with the DAVID online  
300 enrichment tool (Huang da et al. 2009) using all genes in the individual annotation matrix as  
301 background.

302

303 *Gene expression/environment comparison*

304       Sample meta data was downloaded from the CAMERA database as described above and  
305 included data on 12 measured variables (Latitude, Longitude, pH, Temperature, Salinity, etc.).  
306 Additionally, using the downloaded CDS data for each sample, we calculated the genome-wide  
307 usage of codons encoding each amino acid.

308       Significance of expression/environment associations was calculated using the combined  
309 annotation matrix data and calculating the Spearman correlation between all the samples with  
310 both expression and environmental data. These correlations were converted to p-values by  
311 permuting the environmental data 10,000 times and calculating the number of permuted  
312 correlations with an absolute value greater than or equal to the observed correlation, divided by  
313 the number of permutations as described above. These permutation p-values that beat all  
314 permutations were then converted to z-score p-values as described above.

315

316 *Addition of genes to gene sets*

317       The correlation of a gene with a gene set was calculated by finding the median PEP  
318 correlation of the gene with all the genes in the gene set. The significance of this correlation was  
319 calculated by finding the median PEP correlation of the gene with 10,000 permuted gene sets,  
320 created as described above, and summing the number of permuted medians with a greater  
321 correlation and dividing by the total number of permutations.

322       To look for genome wide association study (GWAS) hit enrichment, a list of GWAS  
323 SNPs with p-value less than 0.05 was downloaded from the Genome-Wide Repository of  
324 Associations Between SNPs and Phenotypes (GRASP) database (Leslie et al. 2014). This

325 database was then culled for SNPs with a type II diabetes association and GWAS SNPs in genes  
326 were matched to genes in this data set using human gene IDs. Enrichment of GWAS hits in the  
327 list of genes added to a gene set was calculated by taking the top ten genes by PEP p-value (with  
328 secondary ordering by correlation) with the set and comparing these GWAS p-values to 10,000  
329 random samplings of the same number of GWAS p-values, asking how often a set of p-values  
330 smaller than all of the observed p-values are found by chance. To look for a genome-wide trend,  
331 the list of genes added to a gene set was divided into 1,000 gene bins ordered by the p-value of  
332 PEP association and correlation to calculate the percent of human genes in each bin with a  
333 GWAS p-value in the database. The absolute value of the Pearson correlation between gene bin  
334 and percent GWAS gene was then compared to 10,000 random permutations of gene ordering.

335

### 336 **Data Access**

337 All MMETSP data are available online at <http://camera.crbs.ucsd.edu/mmetsp/index.php>.

338

### 339 **Acknowledgements**

340 We would like to thank the members of the Fraser Lab and D. Petrov for helpful discussions and  
341 advice, and S. Guida for assistance with the MMETSP data.

342

### 343 **Disclosure Declaration**

344 We have no conflicts of interest to disclose.



345 **Figure Legends**

346

347 **Figure 1: Overview of phylogenetic expression profiling approach and data.**

348 **(A)** Overview of traditional phylogenetic profiling (PP; top) and phylogenetic expression  
349 profiling (PEP; bottom). PEP uses the quantitative gene expression levels across species rather  
350 than the binary presence/absence of a gene. Patterns of coordinated evolution hidden to PP can  
351 be potentially uncovered using PEP. **(B)** 18S-based cladogram of the species in this study. **(C)**  
352 Heatmap of expression levels of the 4,219 genes and 657 samples analyzed in this study.  
353 Samples and genes are clustered hierarchically. Color bar near the top shows the phylum of each  
354 sample.

355

356 **Figure 2: Phylogenetic expression profiling reveals coordinated evolution within gene sets.**

357 **(A)** Heatmap of the PP (presence/absence, bottom left) and PEP (expression, top right) Spearman  
358 correlation based scores (see Methods) between ciliary genes. Both PP and PEP values are  
359 hierarchically clustered by the Euclidean distance between the gene PP scores. **(B)** For ciliary  
360 genes in part (A), pairwise PP correlations increase with PEP correlation strength. **(C)** The 662  
361 gene sets with significant PEP scores are clustered by the pairwise correlations between gene  
362 sets. The color bar below the dendrogram shows the 15 unique gene set groups the dendrogram  
363 was divided into and gene ontology enrichments for each group are highlighted in the same  
364 color. Black bars highlight notable groups of gene sets within the larger groups. **(D)** Proteasome  
365 genes were found to be undergoing coordinated evolution and are shown as a heatmap with the  
366 same scale for the gene-gene scores as in (A).

367

368 **Figure 3: Coordinated evolution between gene sets and addition of novel genes to known**  
369 **gene sets.**

370 (A) The coordinated evolution scores between the gene sets for the Golgi apparatus and genes  
371 downregulated in Alzheimer's disease is shown as a heatmap with the same scale as in (B). The  
372 gene pair highlighted in green is shown as a scatterplot to the right; each point is a sample with  
373 measured expression. (B) The coordinated evolution scores for diabetes pathway genes are  
374 shown in heatmap form. In green are the two genes not in this gene set with the strongest PEP  
375 scores to the known genes in this set.

376

377 **Figure 4: Associations between expression and other sample information.**

378 (A) Scatterplot of the association between gene expression and the absolute value of latitude for  
379 the DNA polymerase *POLH*. Each point represents a sample with measured expression. (B)  
380 Scatterplot of the association between expression of the aspartate-tRNA ligase *DARS* and the  
381 abundance of aspartate codons in the coding regions of each sample's transcriptome.

382

383

384 **Supplemental Figure S1: Expression measurements are combined into genes across species**  
385 **based on BLASTP score matching.**

386 Each sample has a set of coding sequences (CDS) with measured expression and up to five  
387 UniRef IDs identified and ranked by BLASTP score. To begin, all the unique rank one UniRef  
388 IDs are used to create a vector of expression for a gene by matching each rank one UniRef ID to  
389 the samples with that ID that are also rank one. These samples are then flagged so that  
390 expression values are not reused. This process is then repeated by iterating through each set of  
391 ranked proteins until all expression values are matched.

392

393 **Supplemental Figure S2: Genes unlikely to be lost are hidden from phylogenetic profiling.**

394 Two of the gene sets identified in this study, aminoacyl-tRNA biosynthesis and mismatch repair  
395 were also analyzed in a recent PP study (Li et al. 2014) and their patterns of loss over  
396 evolutionary time are shown here (blue is gene sequence presence and gray is absence). Neither  
397 of these gene sets results in informative signs of correlated loss.

398

399 **Supplemental Table S1: Gene sets identified as having significant coordinated evolution.**

400 The name of each gene set with coordinated evolution at a 5% FDR is shown along with the  
401 number of genes in that gene set that were present in this analysis, the database source of the  
402 gene set, and the nominal p-value of the gene set.

403

404 **Supplemental Table S2: Gene set pairs with significant coordinated evolution.**

405 The name and database source of each gene set pair with coordinated evolution is shown (<1  
406 expected by chance).

## 407 **References**

- 408 Avidor-Reiss T, Maer AM, Koundakjian E, Polyanovsky A, Keil T, Subramaniam S, Zuker CS. 2004.  
409 Decoding cilia function: defining specialized genes required for compartmentalized cilia biogenesis. *Cell*  
410 **117**: 527-539.
- 411 Bell CG, Benzinou M, Siddiq A, Lecoecur C, Dina C, Lemainque A, Clement K, Basdevant A, Guy-Grand  
412 B, Mein CA, et al. 2004. Genome-wide linkage analysis for severe obesity in french caucasians finds  
413 significant susceptibility locus on chromosome 19q. *Diabetes* **53**: 1857-1865.
- 414 Chiang AP, Nishimura D, Searby C, Elbedour K, Carmi R, Ferguson AL, Secrist J, Braun T, Casavant T,  
415 Stone EM, et al. 2004. Comparative genomic analysis identifies an ADP-ribosylation factor-like gene as  
416 the cause of Bardet-Biedl syndrome (BBS3). *Am J Hum Genet* **75**: 475-484.
- 417 de Boer RA, Verweij N, van Veldhuisen DJ, Westra HJ, Bakker SJ, Gansevoort RT, Muller Kobold AC,  
418 van Gilst WH, Franke L, Mateo Leach I, et al. 2012. A genome-wide association study of circulating  
419 galectin-3. *PLoS One* **7**: e47385.
- 420 Dey G, Jaimovich A, Collins SR, Seki A, Meyer T. 2015. Systematic Discovery of Human Gene Function  
421 and Principles of Modular Organization through Phylogenetic Profiling. *Cell Rep*.
- 422 Eppig JT, Blake JA, Bult CJ, Kadin JA, Richardson JE, Mouse Genome Database Group. 2015. The  
423 Mouse Genome Database (MGD): facilitating mouse as a model for human biology and disease. *Nucleic*  
424 *Acids Res* **43**: D726-36.
- 425 Franks SJ, Hoffmann AA. 2012. Genetics of climate change adaptation. *Annu Rev Genet* **46**: 185-208.
- 426 Fraser HB. 2013. Gene expression drives local adaptation in humans. *Genome Res* **23**: 1089-1096.
- 427 Fraser HB, Hirsh AE, Wall DP, Eisen MB. 2004. Coevolution of gene expression among interacting  
428 proteins. *Proc Natl Acad Sci U S A* **101**: 9033-9038.
- 429 Frischkorn KR, Harke MJ, Gobler CJ, Dyhrman ST. 2014. De novo assembly of *Aureococcus*  
430 *anophagefferens* transcriptomes reveals diverse responses to the low nutrient and low light conditions  
431 present during blooms. *Front Microbiol* **5**: 375.
- 432 Fushan AA, Turanov AA, Lee SG, Kim EB, Lobanov AV, Yim SH, Buffenstein R, Lee SR, Chang KT,  
433 Rhee H, et al. 2015. Gene expression defines natural changes in mammalian lifespan. *Aging Cell* **14**: 352-  
434 365.
- 435 Gitler AD, Bevis BJ, Shorter J, Strathearn KE, Hamamichi S, Su LJ, Caldwell KA, Caldwell GA, Rochet  
436 JC, McCaffery JM, et al. 2008. The Parkinson's disease protein alpha-synuclein disrupts cellular Rab  
437 homeostasis. *Proc Natl Acad Sci U S A* **105**: 145-150.
- 438 Hancock AM, Witonsky DB, Alkorta-Aranburu G, Beall CM, Gebremedhin A, Sukernik R, Utermann G,  
439 Pritchard JK, Coop G, Di Rienzo A. 2011. Adaptations to climate-mediated selective pressures in  
440 humans. *PLoS Genet* **7**: e1001375.

- 441 Higgs PG, Ran W. 2008. Coevolution of codon usage and tRNA genes leads to alternative stable states of  
442 biased codon usage. *Mol Biol Evol* **25**: 2279-2291.
- 443 Huang da W, Sherman BT, Lempicki RA. 2009. Systematic and integrative analysis of large gene lists  
444 using DAVID bioinformatics resources. *Nat Protoc* **4**: 44-57.
- 445 Jiang Q, Wang L, Guan Y, Xu H, Niu Y, Han L, Wei YP, Lin L, Chu J, Wang Q, et al. 2014. Golgin-84-  
446 associated Golgi fragmentation triggers tau hyperphosphorylation by activation of cyclin-dependent  
447 kinase-5 and extracellular signal-regulated kinase. *Neurobiol Aging* **35**: 1352-1363.
- 448 Joshi G, Bekier ME, 2nd, Wang Y. 2015. Golgi fragmentation in Alzheimer's disease. *Front Neurosci* **9**:  
449 340.
- 450 Joshi G, Chi Y, Huang Z, Wang Y. 2014. Abeta-induced Golgi fragmentation in Alzheimer's disease  
451 enhances Abeta production. *Proc Natl Acad Sci U S A* **111**: E1230-9.
- 452 Keeling PJ, Burki F, Wilcox HM, Allam B, Allen EE, Amaral-Zettler LA, Armbrust EV, Archibald JM,  
453 Bharti AK, Bell CJ, et al. 2014. The Marine Microbial Eukaryote Transcriptome Sequencing Project  
454 (MMETSP): illuminating the functional diversity of eukaryotic life in the oceans through transcriptome  
455 sequencing. *PLoS Biol* **12**: e1001889.
- 456 Kohler S, Doelken SC, Mungall CJ, Bauer S, Firth HV, Bailleul-Forestier I, Black GC, Brown DL,  
457 Brudno M, Campbell J, et al. 2014. The Human Phenotype Ontology project: linking molecular biology  
458 and disease through phenotype data. *Nucleic Acids Res* **42**: D966-74.
- 459 Koid AE, Liu Z, Terrado R, Jones AC, Caron DA, Heidelberg KB. 2014. Comparative transcriptome  
460 analysis of four prymnesiophyte algae. *PLoS One* **9**: e97801.
- 461 Leslie R, O'Donnell CJ, Johnson AD. 2014. GRASP: analysis of genotype-phenotype results from 1390  
462 genome-wide association studies and corresponding open access database. *Bioinformatics* **30**: i185-94.
- 463 Li JB, Gerdes JM, Haycraft CJ, Fan Y, Teslovich TM, May-Simera H, Li H, Blacque OE, Li L, Leitch  
464 CC, et al. 2004. Comparative genomics identifies a flagellar and basal body proteome that includes the  
465 BBS5 human disease gene. *Cell* **117**: 541-552.
- 466 Li Y, Calvo SE, Gutman R, Liu JS, Mootha VK. 2014. Expansion of biological pathways based on  
467 evolutionary inference. *Cell* **158**: 213-225.
- 468 Lithwick G, Margalit H. 2005. Relative predicted protein levels of functionally associated proteins are  
469 conserved across organisms. *Nucleic Acids Res* **33**: 1051-1057.
- 470 Masutani C, Araki M, Yamada A, Kusumoto R, Nogimori T, Maekawa T, Iwai S, Hanaoka F. 1999.  
471 Xeroderma pigmentosum variant (XP-V) correcting protein from HeLa cells has a thymine dimer bypass  
472 DNA polymerase activity. *EMBO J* **18**: 3491-3501.
- 473 McGary KL, Park TJ, Woods JO, Cha HJ, Wallingford JB, Marcotte EM. 2010. Systematic discovery of  
474 nonobvious human disease models through orthologous phenotypes. *Proc Natl Acad Sci U S A* **107**: 6544-  
475 6549.

- 476 McKusick-Nathans Institute of Genetic Medicine, Johns Hopkins University (Baltimore, MD). . Online  
477 Mendelian Inheritance in Man, OMIM®.
- 478 Murtagh F. . *Multivariate Data Analysis with Fortran C and Java Code*.
- 479 Mykytyn K, Mullins RF, Andrews M, Chiang AP, Swiderski RE, Yang B, Braun T, Casavant T, Stone  
480 EM, Sheffield VC. 2004. Bardet-Biedl syndrome type 4 (BBS4)-null mice implicate Bbs4 in flagella  
481 formation but not global cilia assembly. *Proc Natl Acad Sci U S A* **101**: 8664-8669.
- 482 Pagliarini DJ, Calvo SE, Chang B, Sheth SA, Vafai SB, Ong SE, Walford GA, Sugiana C, Boneh A,  
483 Chen WK, et al. 2008. A mitochondrial protein compendium elucidates complex I disease biology. *Cell*  
484 **134**: 112-123.
- 485 Pellegrini M, Marcotte EM, Thompson MJ, Eisenberg D, Yeates TO. 1999. Assigning protein functions  
486 by comparative genome analysis: protein phylogenetic profiles. *Proc Natl Acad Sci U S A* **96**: 4285-4288.
- 487 Perry GH, Melsted P, Marioni JC, Wang Y, Bainer R, Pickrell JK, Michelini K, Zehr S, Yoder AD,  
488 Stephens M, et al. 2012. Comparative RNA sequencing reveals substantial genetic variation in  
489 endangered primates. *Genome Res* **22**: 602-610.
- 490 Ryan DE, Pepper AE, Campbell L. 2014. De novo assembly and characterization of the transcriptome of  
491 the toxic dinoflagellate *Karenia brevis*. *BMC Genomics* **15**: 888-2164-15-888.
- 492 Santoferrara LF, Guida S, Zhang H, McManus GB. 2014. De novo transcriptomes of a mixotrophic and a  
493 heterotrophic ciliate from marine plankton. *PLoS One* **9**: e101418.
- 494 Savolainen O, Lascoux M, Merila J. 2013. Ecological genomics of local adaptation. *Nat Rev Genet* **14**:  
495 807-820.
- 496 Sievers F, Wilm A, Dineen D, Gibson TJ, Karplus K, Li W, Lopez R, McWilliam H, Remmert M, Soding  
497 J, et al. 2011. Fast, scalable generation of high-quality protein multiple sequence alignments using Clustal  
498 Omega. *Mol Syst Biol* **7**: 539.
- 499 Stamatakis A. 2006. RAxML-VI-HPC: maximum likelihood-based phylogenetic analyses with thousands  
500 of taxa and mixed models. *Bioinformatics* **22**: 2688-2690.
- 501 Subramanian A, Tamayo P, Mootha VK, Mukherjee S, Ebert BL, Gillette MA, Paulovich A, Pomeroy  
502 SL, Golub TR, Lander ES, et al. 2005. Gene set enrichment analysis: a knowledge-based approach for  
503 interpreting genome-wide expression profiles. *Proc Natl Acad Sci U S A* **102**: 15545-15550.
- 504 Suzek BE, Huang H, McGarvey P, Mazumder R, Wu CH. 2007. UniRef: comprehensive and non-  
505 redundant UniProt reference clusters. *Bioinformatics* **23**: 1282-1288.
- 506 Tabach Y, Billi AC, Hayes GD, Newman MA, Zuk O, Gabel H, Kamath R, Yacoby K, Chapman B,  
507 Garcia SM, et al. 2013a. Identification of small RNA pathway genes using patterns of phylogenetic  
508 conservation and divergence. *Nature* **493**: 694-698.

- 509 Tabach Y, Golan T, Hernandez-Hernandez A, Messer AR, Fukuda T, Kouznetsova A, Liu JG, Lilienthal  
510 I, Levy C, Ruvkun G. 2013b. Human disease locus discovery and mapping to molecular pathways  
511 through phylogenetic profiling. *Mol Syst Biol* **9**: 692.
- 512 Thompson DA, Roy S, Chan M, Styczynsky MP, Pfiffner J, French C, Socha A, Thielke A, Napolitano S,  
513 Muller P, et al. 2013. Evolutionary principles of modular gene regulation in yeasts. *Elife* **2**: e00603.
- 514 Wagner GP, Kin K, Lynch VJ. 2012. Measurement of mRNA abundance using RNA-seq data: RPKM  
515 measure is inconsistent among samples. *Theory Biosci* **131**: 281-285.
- 516 Wellcome Trust Case Control Consortium. 2007. Genome-wide association study of 14,000 cases of  
517 seven common diseases and 3,000 shared controls. *Nature* **447**: 661-678.
- 518

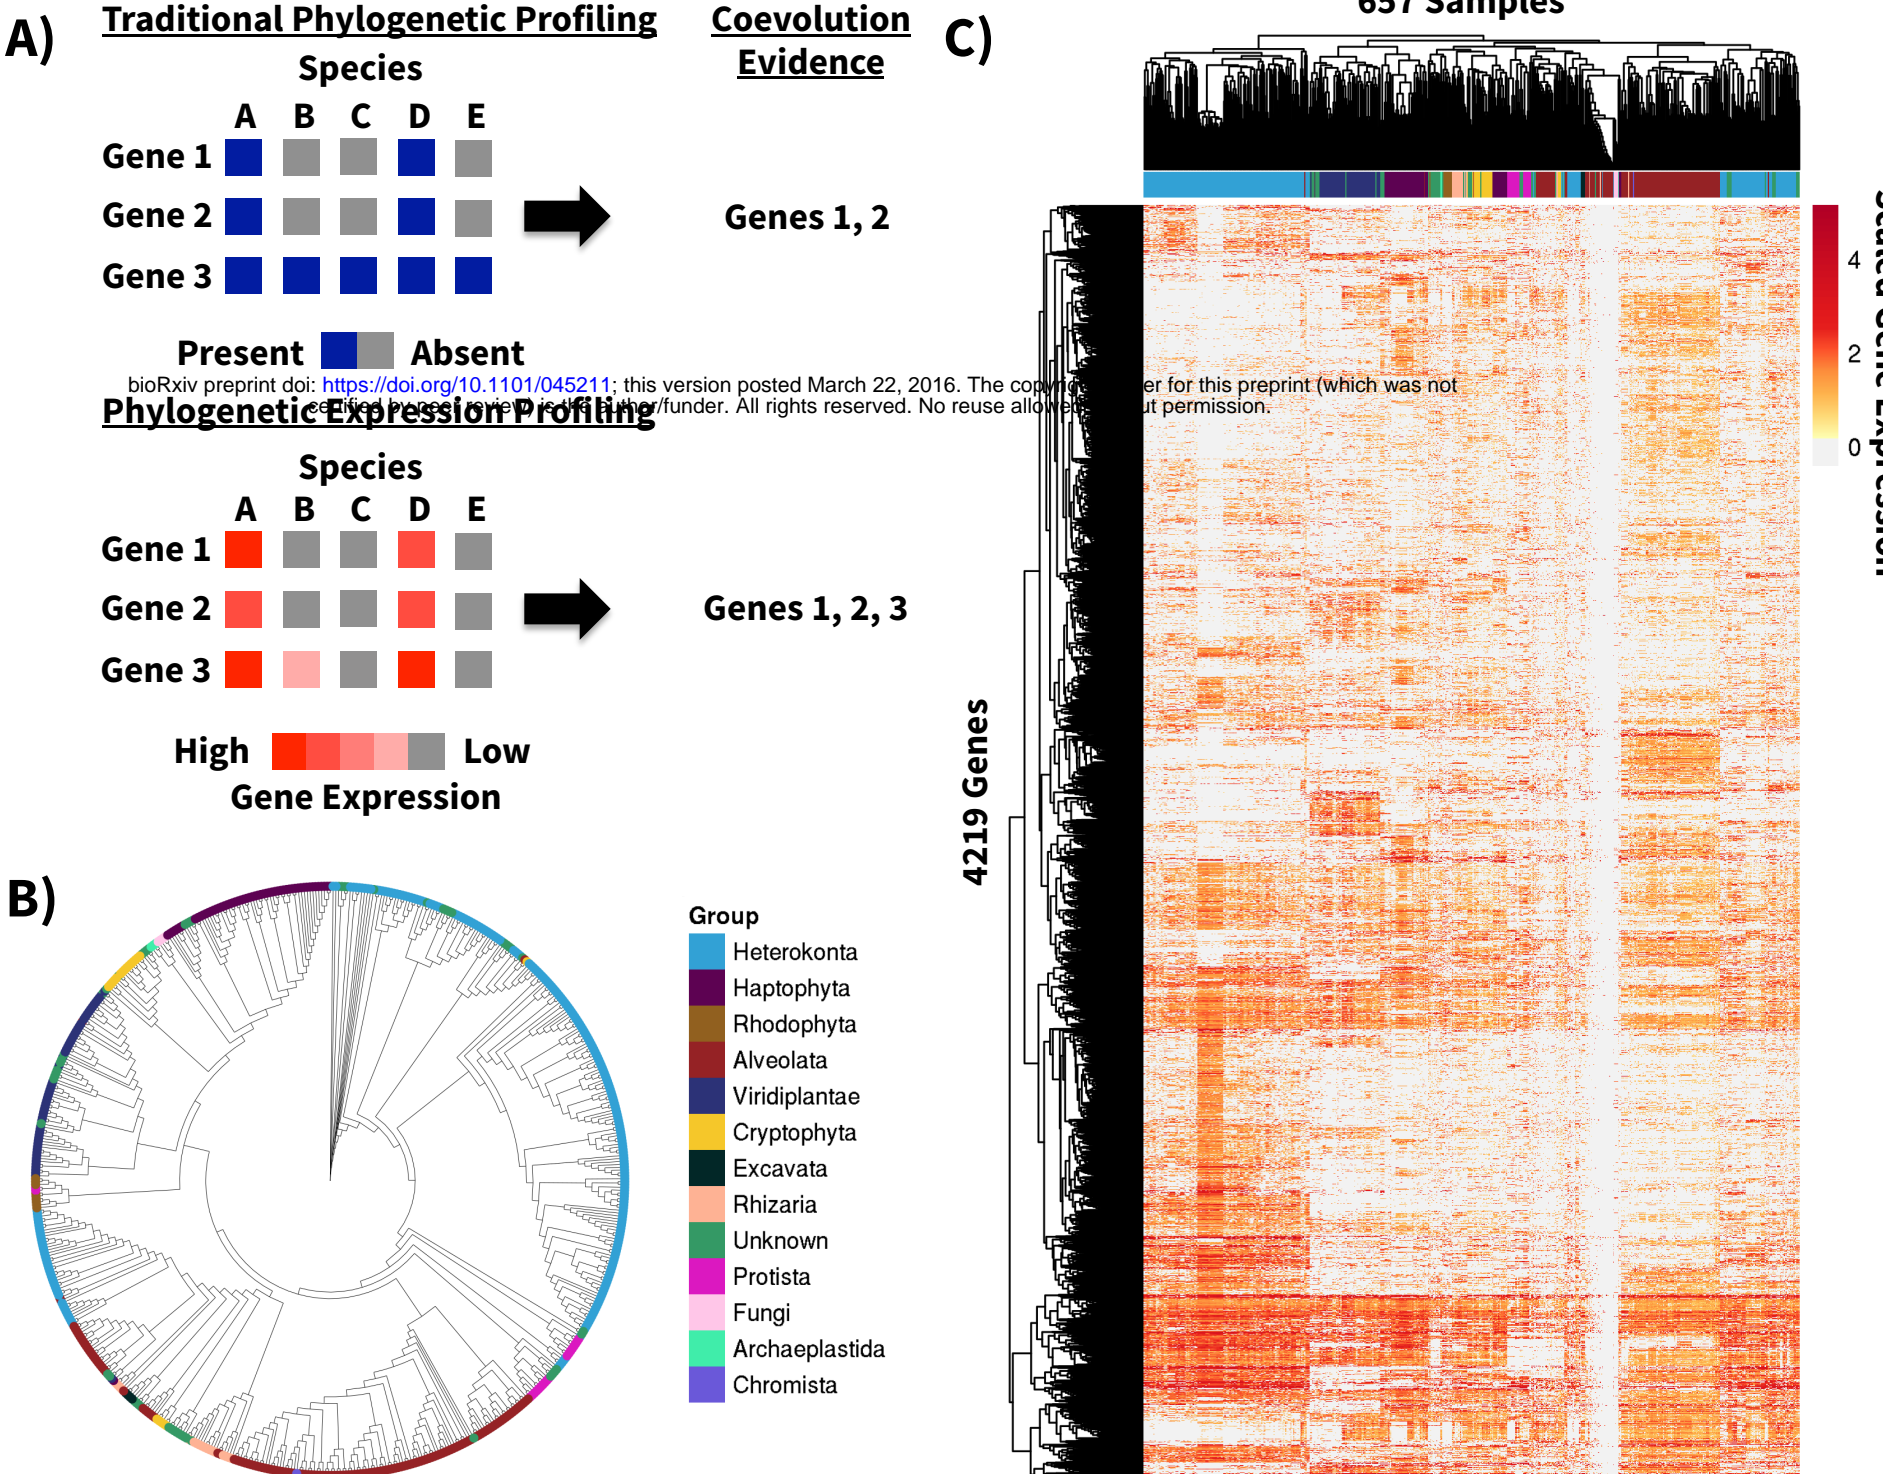

**Figure 1**



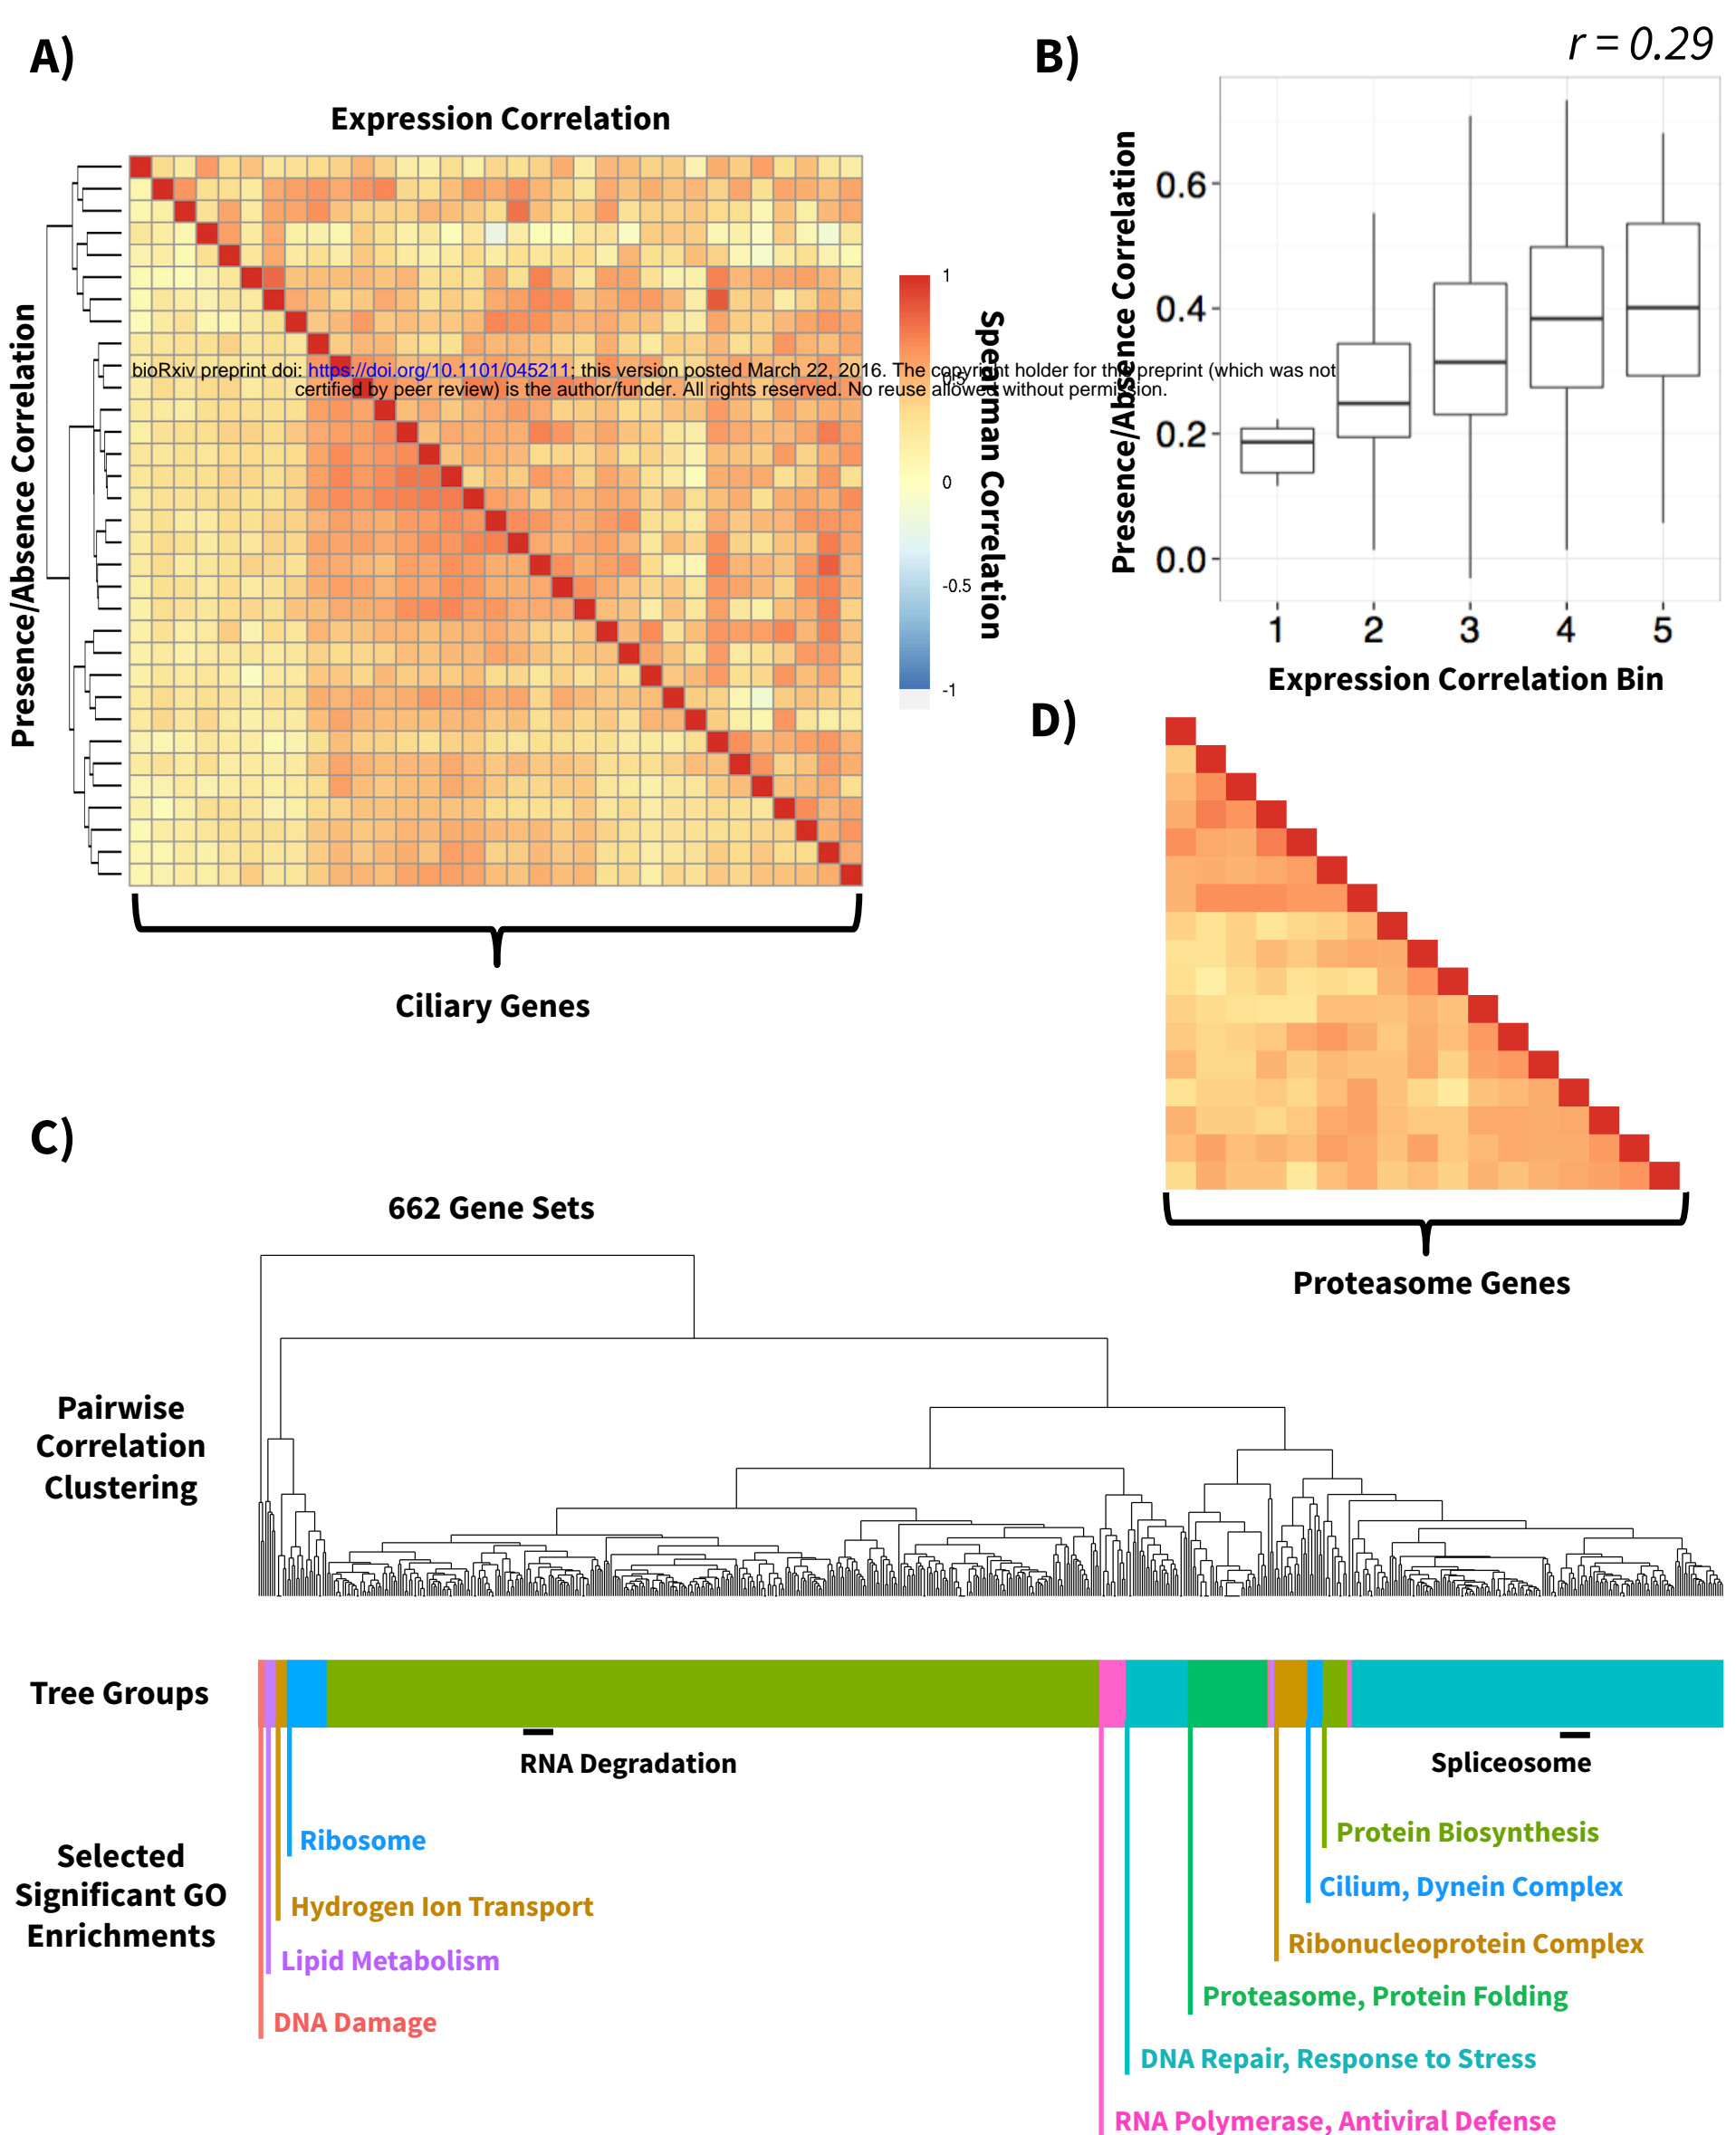

**Figure 2**

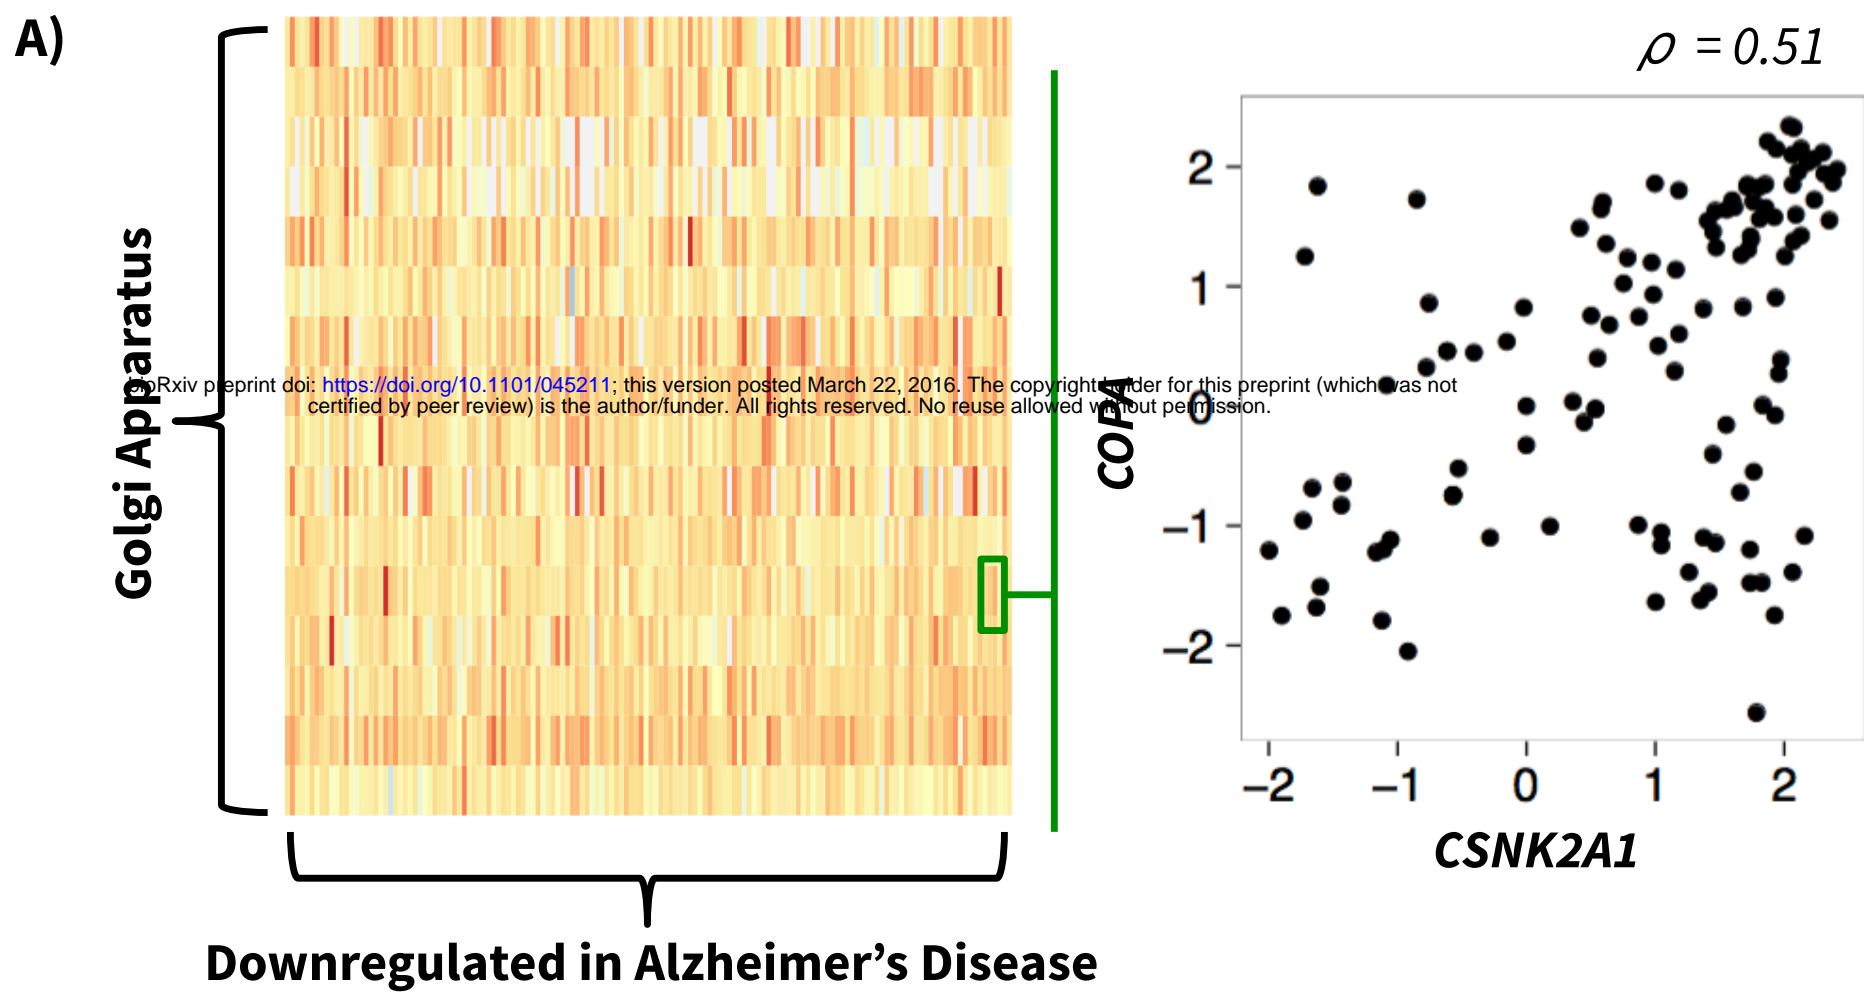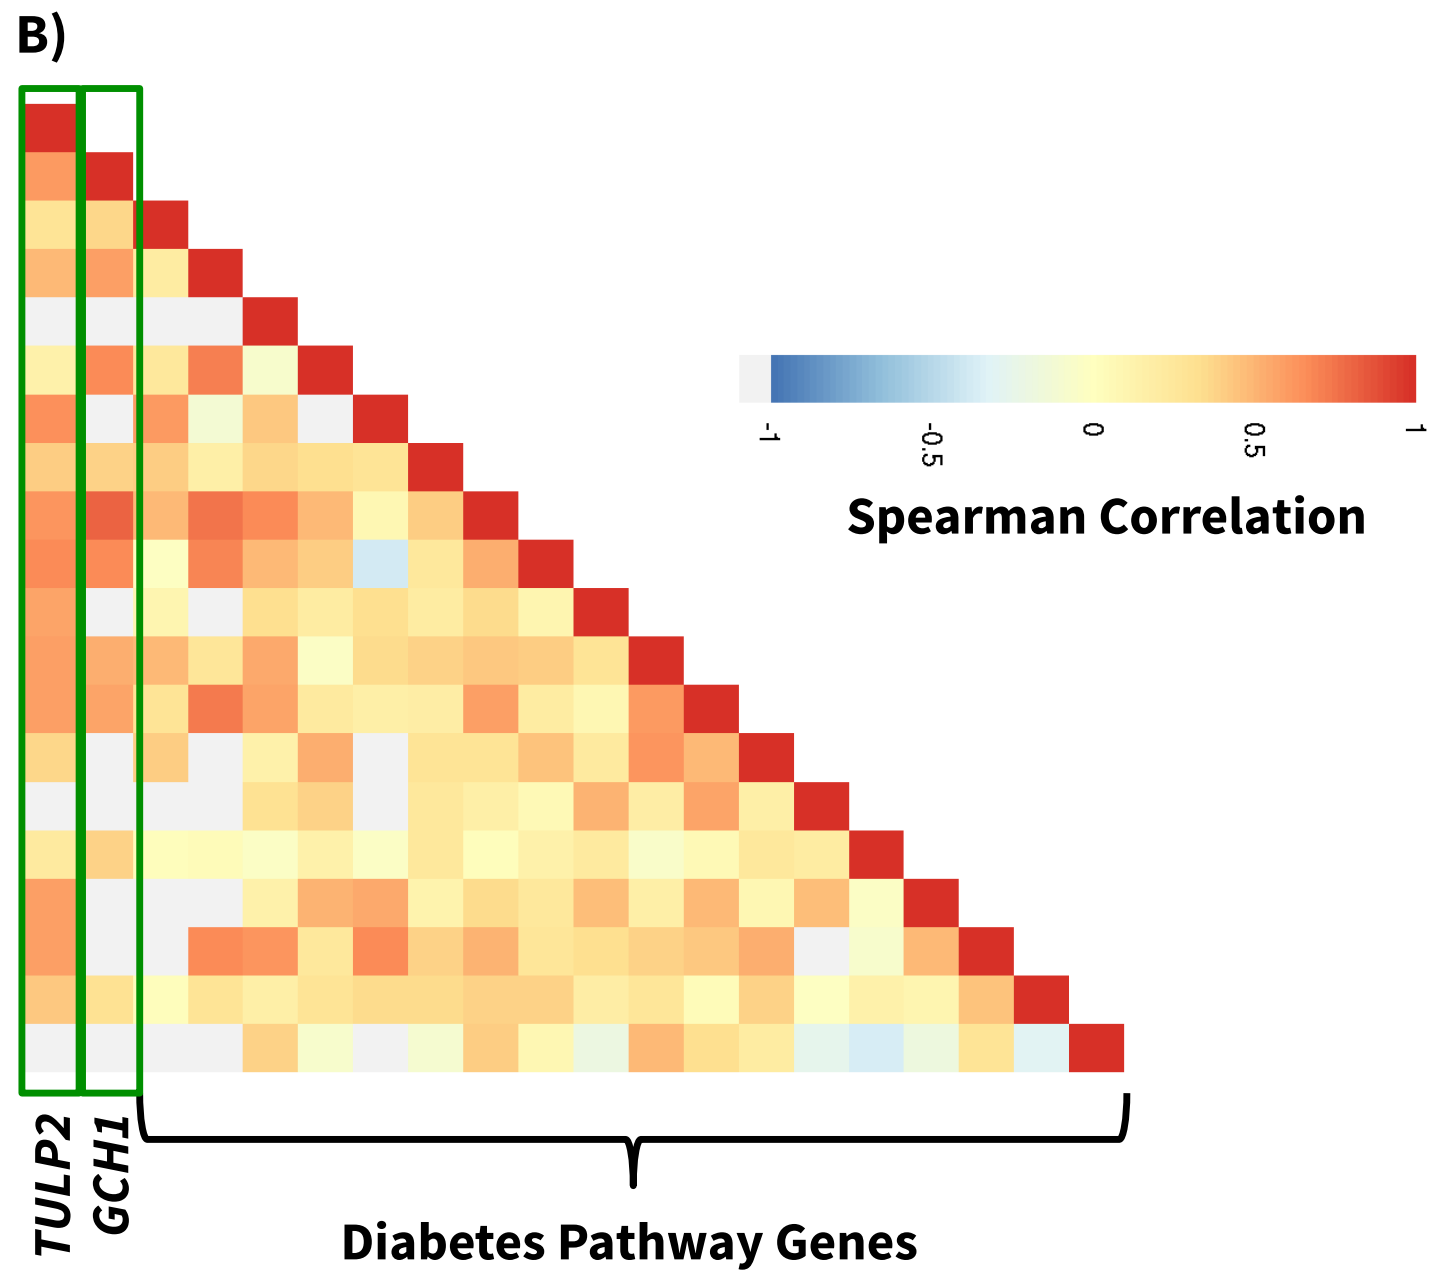

**Figure 3**

**A)****Latitude*****POLH*** $\rho = -0.52$ 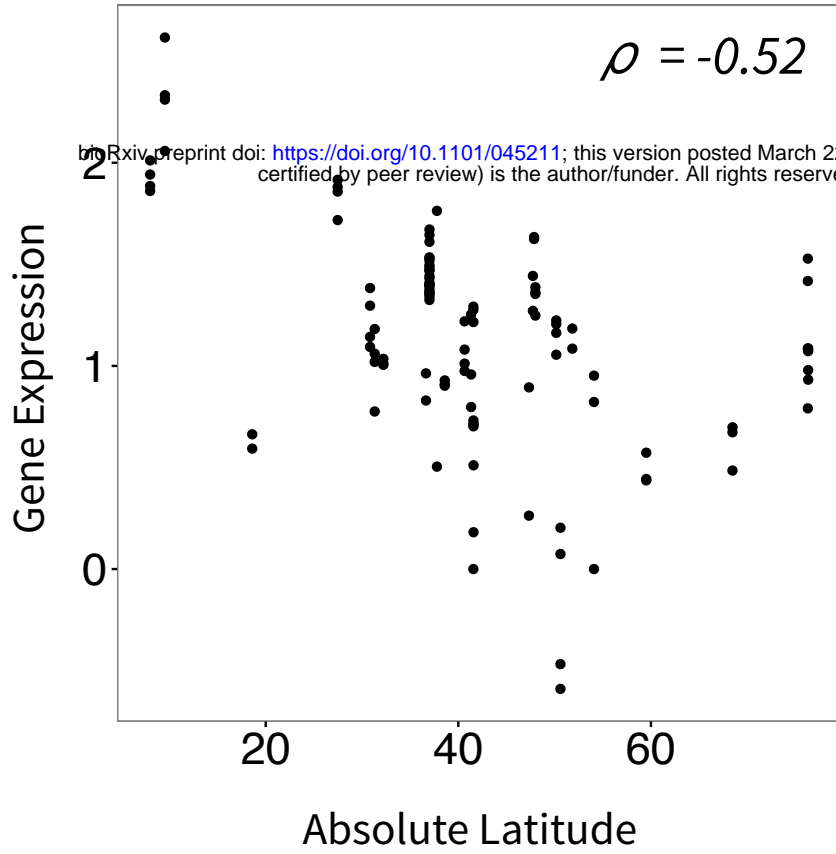**B)****Aspartate Codon Usage*****DARS*** $\rho = 0.40$ 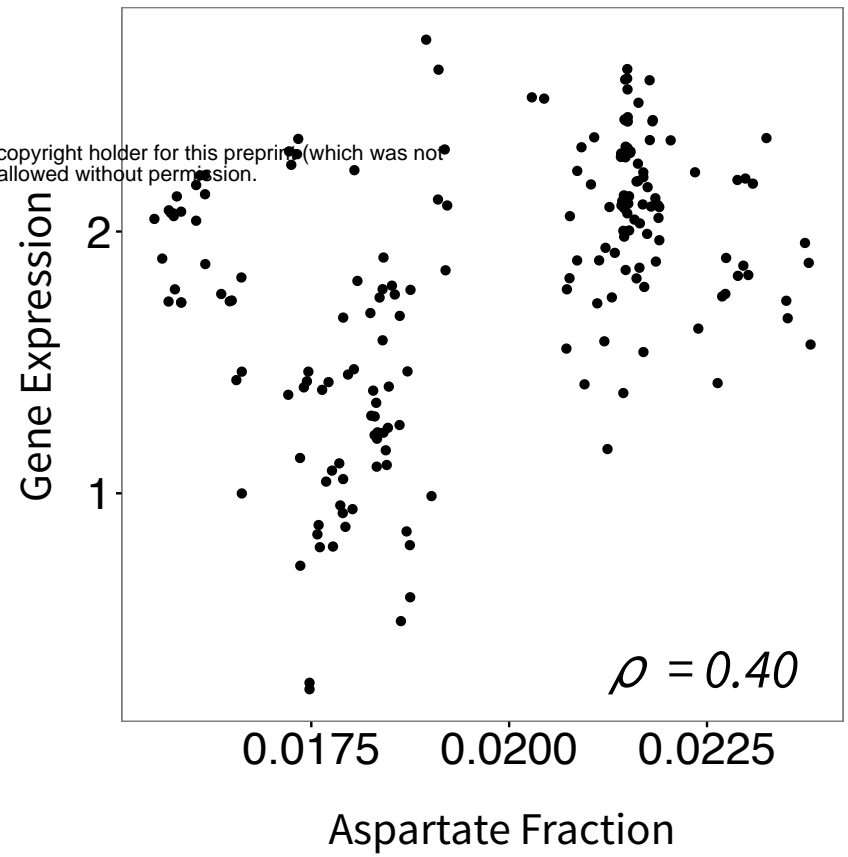**Figure 4**

### Each CDS's Proteins Ranked by BLASTP Score

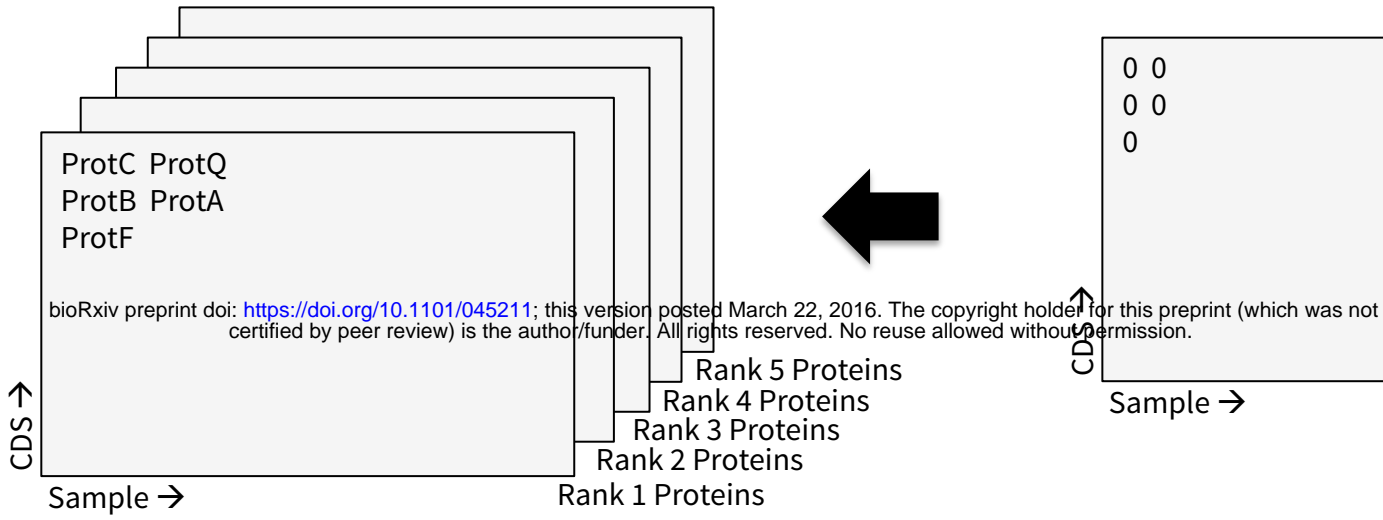

### Does Each CDS Have A Match?

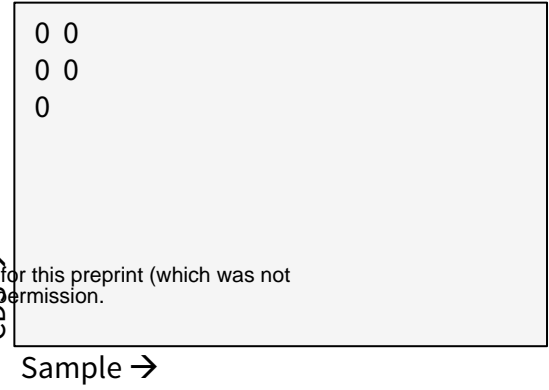

### Comparing Unmatched CDS Unique Rank X Protein vs. Rank Y Protein Matrix

Unique Rank 1 Proteins

ProtC ProtQ ProtB ProtA ProtF

### Update CDS Match Matrix Iterate X and Y Appropriately

Rank 1 Proteins

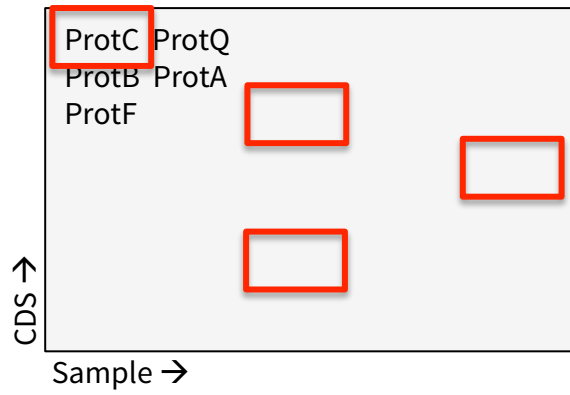

### Resolve Ties Through BLASTP Scores

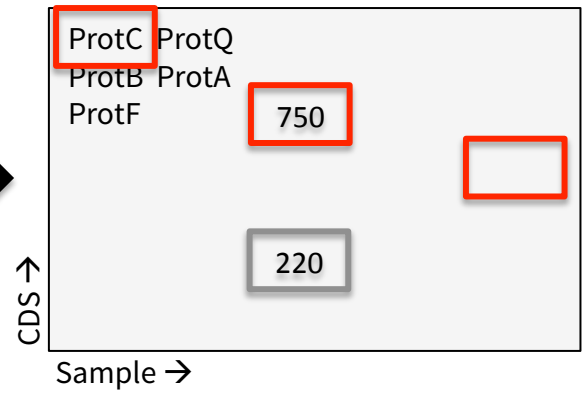

# Aminoacyl-tRNA Biosynthesis Gene Set in CLIME:

## Overview of Evolutionarily Conserved Modules (ECMs)

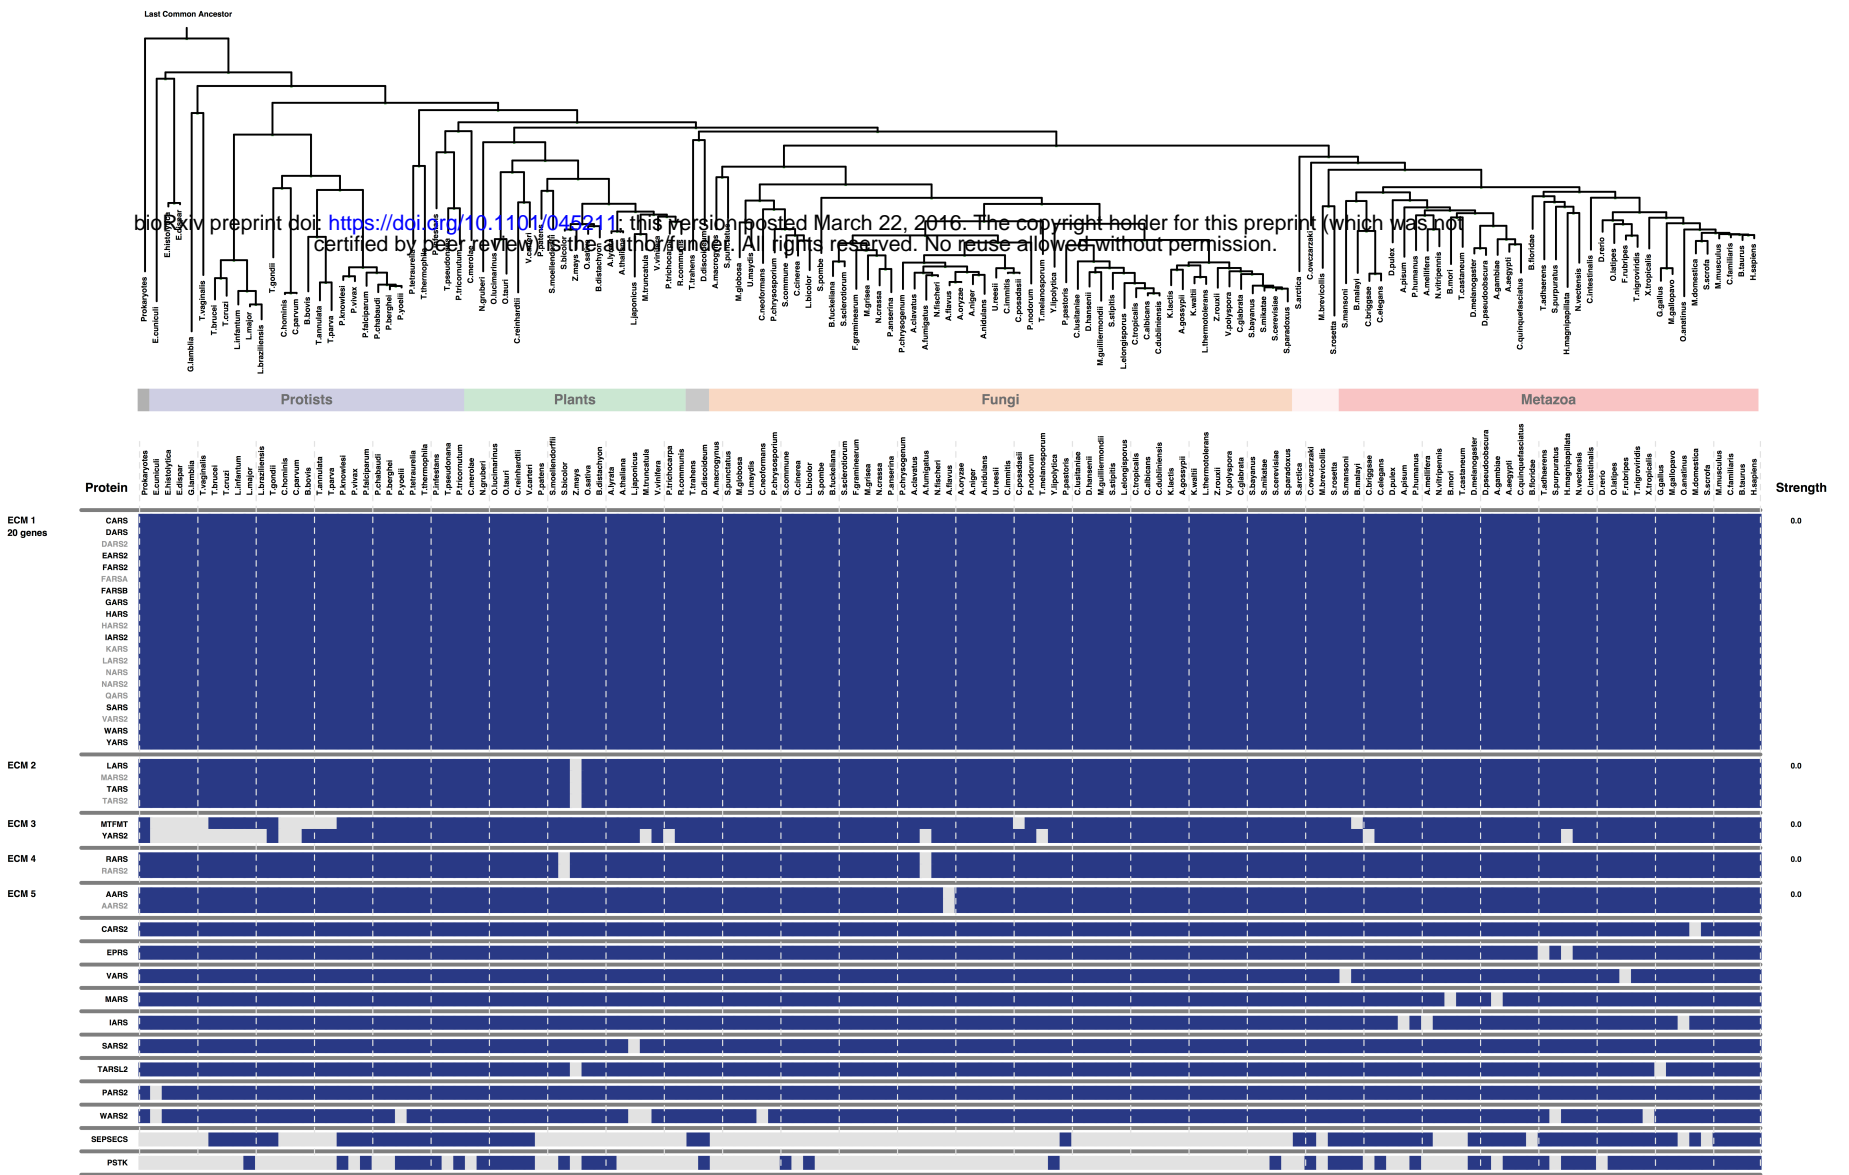

# Mismatch Repair Gene Set in CLIME:

## Overview of Evolutionarily Conserved Modules (ECMs)

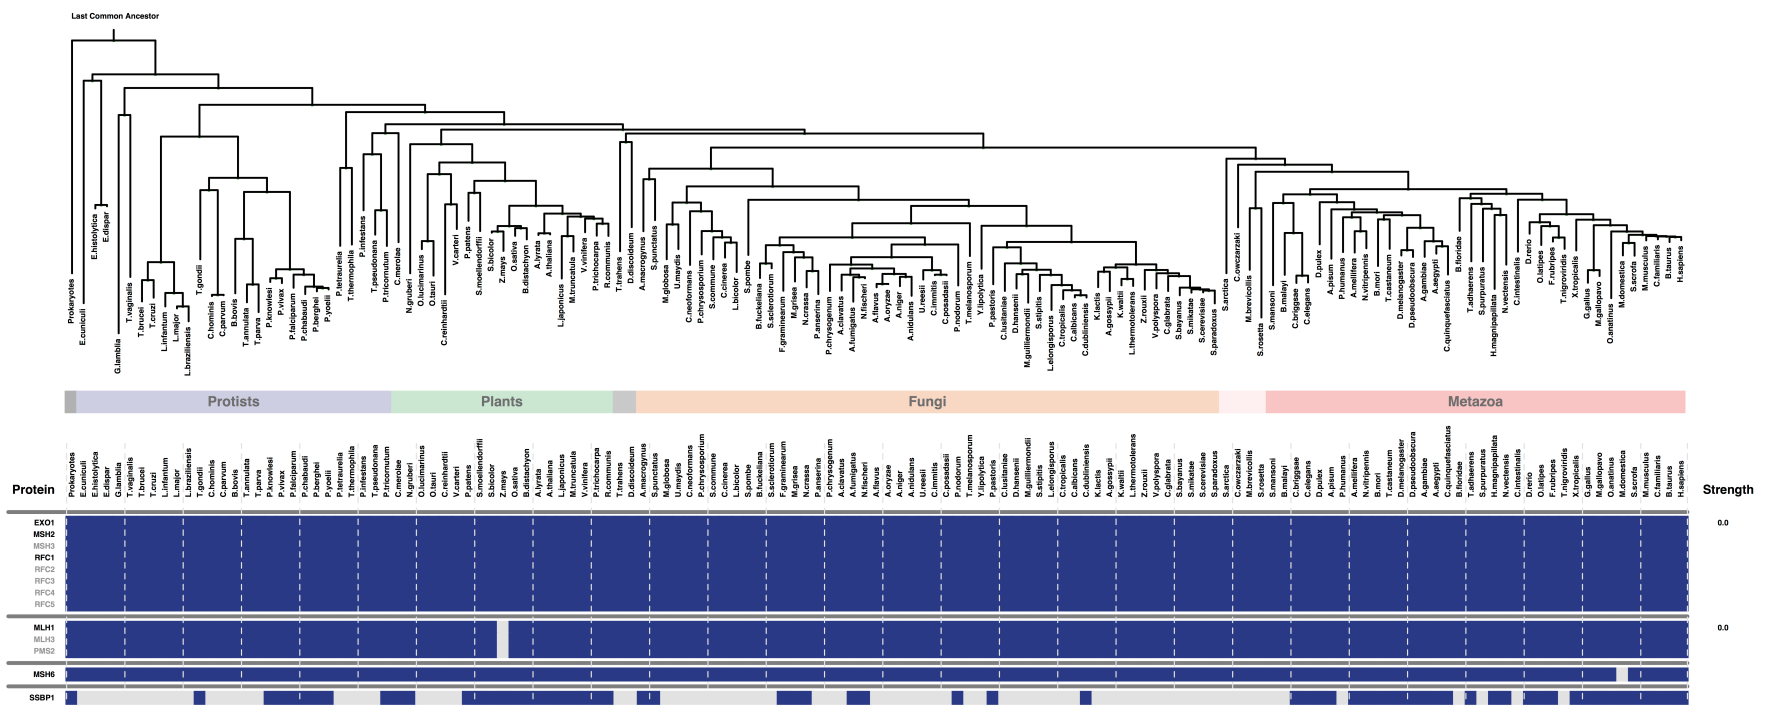

Source: http://biorxiv.org/content/10.1101/045211v1.full.pdf
